# Supplementary material for: Deletion at 2q14.3 is associated with worse response to TNF-α blockers in patients with rheumatoid arthritis
Source: PubMed Central journal article supplement (PMC6714408; doi:10.1186/s13075-019-1983-y), 2019-08-28
Supplement: 13075_2019_1983_MOESM1_ESM.pdf [file 13075_2019_1983_MOESM1_ESM.pdf]

**Table S1** Clinical characteristics of the study patients with rheumatoid arthritis

|                                                   | All patients  | Non-responder | Responder     | <i>P</i> <sup>†</sup>     |
|---------------------------------------------------|---------------|---------------|---------------|---------------------------|
| Samples, N                                        | 357           | 32            | 325           |                           |
| Age at symptom onset, mean ± SD (years)           | 41.76 ± 13.62 | 42.75 ± 14.07 | 41.66 ± 13.60 | 0.68                      |
| Female, N                                         | 312 (87.4%)   | 27 (84.4%)    | 285 (87.7%)   | 0.79                      |
| BMI, kg/m <sup>2</sup>                            | 22.51 ± 3.53  | 22.70 ± 4.22  | 22.50 ± 3.46  | 0.81                      |
| Anti-cyclic citrullinated peptide-antibody, N (%) | 307 (86.0%)   | 26 (81.3%)    | 281 (86.5%)   | 0.59                      |
| Methotrexate, N (%)                               | 338 (94.7%)   | 28 (87.5%)    | 310 (95.4%)   | 0.14                      |
| Disease duration, years                           | 8.21 ± 7.58   | 6.03 ± 5.75   | 8.43 ± 7.72   | 0.035*                    |
| Anti-TNF                                          |               |               |               |                           |
| Adalimumab, N (%)                                 | 60 (16.8%)    | 5 (15.6%)     | 55 (16.9%)    | 1.0                       |
| Etanercept, N (%)                                 | 260 (72.8%)   | 23 (71.9%)    | 237 (72.9%)   | 1.0                       |
| Golimumab, N (%)                                  | 19 (5.3%)     | 3 (9.4%)      | 16 (4.92%)    | 0.51                      |
| Infiximab, N (%)                                  | 18 (5.0%)     | 1 (3.1%)      | 17 (5.2%)     | 0.92                      |
| DAS28                                             |               |               |               |                           |
| Baseline                                          | 6.24 ± 0.89   | 6.08 ± 0.86   | 6.26 ± 0.90   | 0.28                      |
| Δ DAS28                                           | 2.48 ± 1.31   | 0.34 ± 0.76   | 2.78 ± 1.06   | < 2.2×10 <sup>-16</sup> * |
| CDAI                                              |               |               |               |                           |
| Baseline                                          | 32.85 ± 11.83 | 27.67 ± 7.76  | 33.60 ± 12.14 | 8.0×10 <sup>-3</sup> *    |
| Δ CDAI                                            | 21.52 ± 12.91 | 3.60 ± 9.87   | 24.1 ± 11.13  | < 3.9×10 <sup>-14</sup> * |

<sup>†</sup>Each of p-values provided was obtained by either the chi-square test using categorical data or the t-test in numerical data.

\*Significant (<0.05).

SD, standard deviation, BMI, Body mass index, TNF, tumor necrosis factor, DAS28, Disease Activity Scores based on 28 joint counts, CDAI, Clinical disease activity index.

**Table S2** The number of variants and subjects in a quality control (QC) procedure. We note that all the 370 subjects treated with TNF- $\alpha$  blockers were retained and used to call copy number variation in subsequent analyses.

**Table S2a** Sample QC Summary

| QC step                  | Samples removed, N | Samples retained, N |
|--------------------------|--------------------|---------------------|
|                          |                    | 922 (initial size)  |
| Low call rate (< 95%)    | 0                  | 922                 |
| Excessive heterozygosity | 4                  | 918                 |
| Multidimensional scale   | 16                 | 902                 |
| Excessive singleton      | 1                  | 901                 |
| Cryptic relatedness      | 1                  | 900                 |
| Gender mismatch          | 0                  | 900                 |
| Summary                  | 22                 | 900                 |

**Table S2b** Marker QC Summary

| QC step                                                            | Variants removed, N | Variants retained, N     |
|--------------------------------------------------------------------|---------------------|--------------------------|
|                                                                    |                     | 2,623,498 (initial size) |
| Duplicated SNPs                                                    | 48,514              | 2,574,984                |
| Low call rate (< 95%), HWE ( $P_{\text{HWE}} < 1 \times 10^{-6}$ ) | 110,058             | 2,464,926                |
| Summary                                                            | 158,572             | 2,464,926                |

HWE, Hardy Weinberg equilibrium
